# Supplementary material
Source: Springer Nature journal article supplement (https://www.springermedizin.de/resource/supplementary/12943_2013_1180_MOESM2_ESM.pdf/9552244)

**A**

Leu617Ile  
Arg621His  
Glu710Gly  
Wild-type  
Vector

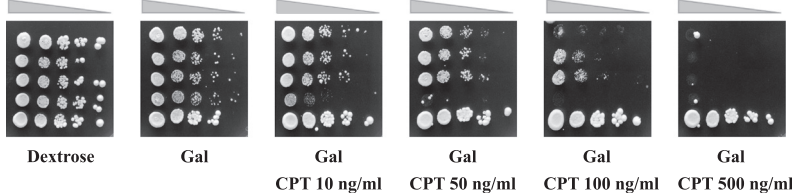**B**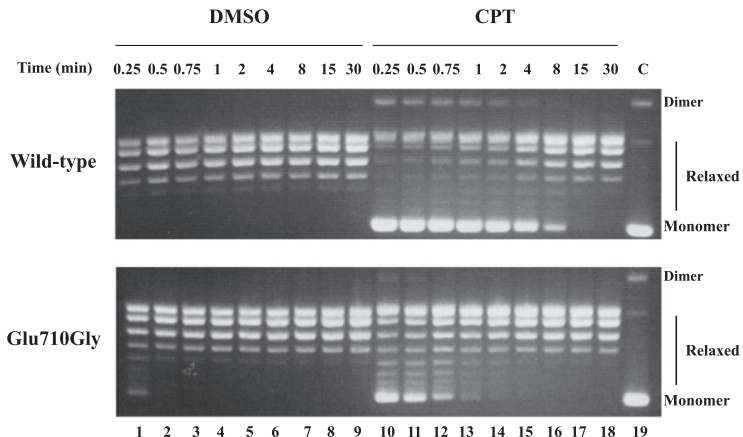

Supplement: MOESM2 [file 9552244]
